# Supplementary material for: Effectiveness of the Nutritional App “MyNutriCart” on Food Choices Related to Purchase and Dietary Behavior: A Pilot Randomized Controlled Trial
Source: PubMed Central journal article supplement (PMC6315974; doi:10.3390/nu10121967), 2018-12-12
Supplement: nutrients-10-01967-s001.pdf [file nutrients-10-01967-s001.pdf]

## Supplementary Materials

**Table S1.** Frequency of food consumption at baseline and post intervention by groups ( $n = 43$ )<sup>†</sup>.

| Variable                | Baseline                       |      |                        |      | Post Intervention              |      |                        |      | Difference between Groups at Baseline | Difference between Baseline and Post Intervention |           | Adjusted Mean Difference | 95% CI       | $p$ value ** | Eta-squared |
|-------------------------|--------------------------------|------|------------------------|------|--------------------------------|------|------------------------|------|---------------------------------------|---------------------------------------------------|-----------|--------------------------|--------------|--------------|-------------|
|                         | Traditional group ( $n = 18$ ) |      | App group ( $n = 25$ ) |      | Traditional group ( $n = 18$ ) |      | App group ( $n = 25$ ) |      |                                       | Traditional Group                                 | App Group |                          |              |              |             |
|                         | Mean                           | SD   | Mean                   | SD   | Mean                           | SD   | Mean                   | SD   |                                       |                                                   |           |                          |              |              |             |
| Fruits                  | 0.49                           | 0.50 | 0.67                   | 0.58 | 0.69                           | 0.57 | 0.94                   | 0.72 | 0.29                                  | 0.06                                              | 0.02      | 0.14                     | -0.22, -0.49 | 0.44         | 0.02        |
| Vegetables              | 0.89                           | 0.68 | 0.76                   | 0.65 | 0.78                           | 0.63 | 0.92                   | 0.61 | 0.55                                  | 0.44                                              | 0.30      | 0.18                     | -0.18, 0.54  | 0.32         | 0.03        |
| Starchy vegetables      | 0.43                           | 0.47 | 0.58                   | 0.56 | 0.34                           | 0.26 | 0.37                   | 0.33 | 0.34                                  | 0.75                                              | 0.59      | 0.01                     | -0.18, 0.20  | 0.92         | 0.0003      |
| Refined grains          | 1.50                           | 0.84 | 1.77                   | 2.87 | 1.02                           | 0.86 | 1.05                   | 0.77 | 0.70                                  | 0.86                                              | 0.86      | 0.03                     | -0.48, 0.54  | 0.92         | 0.0003      |
| Whole grains            | 0.59                           | 0.56 | 0.64                   | 0.51 | 0.60                           | 0.46 | 0.91                   | 0.60 | 0.77                                  | 0.20                                              | 0.18      | 0.28                     | -0.03, 0.59  | 0.08         | 0.08        |
| Legumes                 | 0.55                           | 0.48 | 0.42                   | 0.30 | 0.46                           | 0.46 | 0.34                   | 0.32 | 0.29                                  | 0.27                                              | 0.16      | -0.08                    | -0.31, 0.15  | 0.50         | 0.01        |
| Healthy proteins †      | 1.50                           | 1.18 | 1.19                   | 0.65 | 1.17                           | 0.58 | 1.05                   | 0.42 | 0.26                                  | 0.51                                              | 0.83      | -0.03                    | -0.31, 0.25  | 0.82         | 0.001       |
| Red meats               | 0.46                           | 0.31 | 0.34                   | 0.31 | 0.29                           | 0.48 | 0.27                   | 0.29 | 0.23                                  | 0.47                                              | 0.37      | 0.02                     | -0.21, 0.25  | 0.85         | 0.001       |
| Cold cuts & cured meats | 0.43                           | 0.43 | 0.33                   | 0.29 | 0.17                           | 0.26 | 0.37                   | 0.30 | 0.36                                  | 0.05                                              | 0.10      | 0.23                     | 0.06, 0.40   | 0.01         | 0.15        |
| Whole-fat dairies       | 0.89                           | 0.61 | 0.60                   | 0.55 | 0.48                           | 0.53 | 0.52                   | 0.44 | 0.11                                  | 0.73                                              | 0.73      | 0.09                     | -0.22, 0.40  | 0.56         | 0.01        |
| Low-fat dairies         | 0.39                           | 0.44 | 0.78                   | 0.68 | 0.45                           | 0.39 | 0.67                   | 0.56 | 0.04                                  | 0.08                                              | 0.15      | 0.16                     | -0.17, 0.48  | 0.33         | 0.02        |
| 100% fruit juices       | 0.44                           | 0.55 | 0.27                   | 0.28 | 0.21                           | 0.30 | 0.21                   | 0.30 | 0.20                                  | 1.00                                              | 0.83      | 0.03                     | -0.16, 0.21  | 0.77         | 0.002       |
| SSB ††                  | 0.87                           | 0.68 | 0.68                   | 0.66 | 0.59                           | 0.59 | 0.63                   | 0.62 | 0.36                                  | 0.90                                              | 0.77      | 0.12                     | -0.23, 0.47  | 0.49         | 0.01        |

<sup>†</sup> Data collected from FFQ at baseline and at the end of the intervention; † includes nuts, fish, and poultry; †† SSB: sugar sweetened beverages; SD: standard deviation. \*  $t$  test. \*\* ANCOVA was used to assess differences between intervention groups, with frequency of each food consumption as the dependent variable, group assignment as the fixed factor, adjusting for frequency of food consumption at baseline. Level of significance was  $p < 0.05$ .

**Table S2.** Weight and BMI of study participants at baseline and post intervention by groups ( $n = 37$ ) †.

| Variable                 | Baseline                       |      | Post Intervention      |      |                                |      | Difference between Groups at Baseline | Difference between Baseline and Post Intervention |             |      |      |
|--------------------------|--------------------------------|------|------------------------|------|--------------------------------|------|---------------------------------------|---------------------------------------------------|-------------|------|------|
|                          | Traditional group ( $n = 19$ ) |      | App group ( $n = 18$ ) |      | Traditional group ( $n = 19$ ) |      |                                       | App group ( $n = 18$ )                            |             |      |      |
|                          | Mean                           | SD   | Mean                   | SD   | Mean                           | SD   | Mean                                  | SD                                                | $p$ value * |      |      |
| Weight (kg)              | 83.3                           | 14.9 | 93.3                   | 20.4 | 82.8                           | 15.2 | 92.9                                  | 21.5                                              | 0.09        | 0.12 | 0.27 |
| BMI (kg/m <sup>2</sup> ) | 33.3                           | 5.8  | 35.6                   | 7.5  | 33.1                           | 6.0  | 35.4                                  | 7.8                                               | 0.29        | 0.13 | 0.25 |

SD: standard deviation. \*  $t$  test. \* ANCOVA was used to assess differences between intervention groups, with weight or BMI at the end of study as the dependent variable, group assignment as the fixed factor, adjusting for weight and BMI at baseline. Adjusted mean difference for weight was -0.29 (95%CI -1.86, 1.28;  $p$  value 0.71; Eta-squared 0.004). Adjusted mean difference for BMI was 0.11 (95%CI -0.42, 0.64;  $p$  value 0.68; Eta-squared 0.005). Level of significance was  $p < 0.05$ .
